# Supplementary material for: Low-Temperature Emission Dynamics of Methylammonium Lead Bromide Hybrid Perovskite Thin Films at the Sub-Micrometer Scale
Source: Nanomaterials (Basel). 2023 Aug 19;13(16):2376. doi: 10.3390/nano13162376 (PMC10458237; doi:10.3390/nano13162376)
Supplement: Supplementary file 1 [file nanomaterials-13-02376-s001.zip]

Archive with 14 entries (14 files):
- zone1_100uW.mp4
- zone1_10uW.mp4
- zone1_1uW.mp4
- zone1_100nW.mp4
- zone1_10nW.mp4
- zone1_1nW.mp4
- zone1_X.mp4
- Houel_supplementary_revised_r2.pdf
- HOUEL_supp_revised_r2.tex
- supp_FLIM.png
- supp_IRFb.png
- supp_lowT_uscope.png
- Supp_Xpower_dep.png
- supp_xrd.png
